# Supplementary material for: Smoking Cessation and the Risk of Diabetes Mellitus and Impaired Fasting Glucose: Three-Year Outcomes after a Quit Attempt
Source: PubMed Central journal article supplement (PMC4043674; doi:10.1371/journal.pone.0098278), 2014-06-03
Supplement: pone.0098278.s001.pdf [file pone.0098278.s001.pdf]

Figure 1. CONSORT Flow Diagram

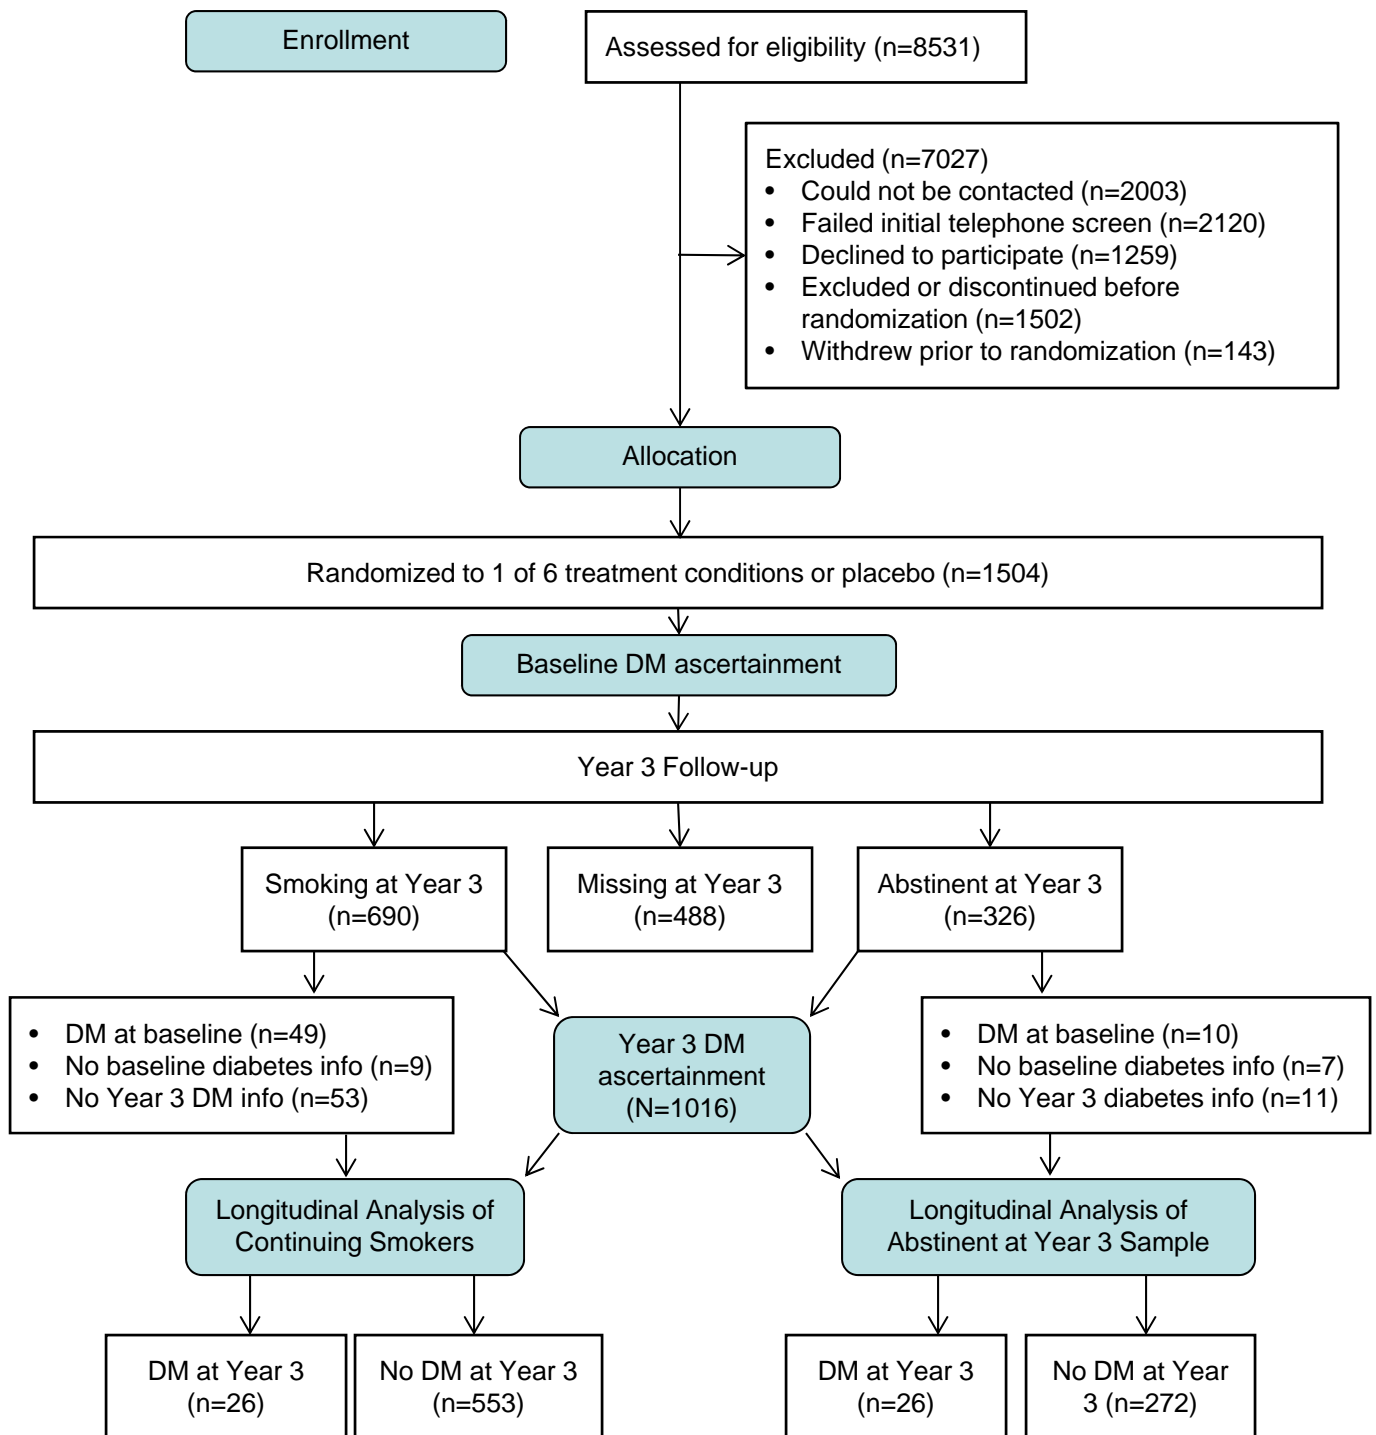

DM = diabetes mellitus
