# Supplementary material for: Smoking Cessation and the Risk of Diabetes Mellitus and Impaired Fasting Glucose: Three-Year Outcomes after a Quit Attempt
Source: PubMed Central journal article supplement (PMC4043674; doi:10.1371/journal.pone.0098278), 2014-06-03
Supplement: pone.0098278.s003.pdf [file pone.0098278.s003.pdf]

**New Table 3A. Best-Fitting Multivariate Multinomial Logistic Regression Model Predicting Year 3 Glucose Group (Normal, Impaired Fasting Glucose, Diabetes Mellitus)**

**THIS ANALYSIS:** uses the new version of Year 3 Smoking Status [if smoking at either 6-months or 3 years (or both), then the variable was coded as smoking]. Differences in the significance of effects (original vs new results) are highlighted in BLUE.

| New Table 3A                                                                               | ORIGINAL ANALYSIS |                   |                          |                   | NEW ANALYSIS<br>(Uses new Year 3 Smoking Status Variable) |                   |                          |                   |
|--------------------------------------------------------------------------------------------|-------------------|-------------------|--------------------------|-------------------|-----------------------------------------------------------|-------------------|--------------------------|-------------------|
|                                                                                            | Year 3 IFG        |                   | Year 3 diabetes mellitus |                   | Year 3 IFG                                                |                   | Year 3 diabetes mellitus |                   |
| Main Effects or Interactions                                                               | Wald $\chi^2$     | p-value           | Wald $\chi^2$            | p-value           | Wald $\chi^2$                                             | p-value           | Wald $\chi^2$            | p-value           |
| Year 3 smoking status (abstinent vs. smoking)                                              | 0.75              | 0.387             | 0.73                     | 0.392             | 2.67                                                      | 0.102             | 0.34                     | 0.560             |
| Age (years)                                                                                | 9.46              | <b>0.011</b>      | 14.53                    | <b>0.0001</b>     | 6.63                                                      | <b>0.010</b>      | 14.02                    | <b>0.0002</b>     |
| Gender                                                                                     | 0.85              | 0.357             | 2.29                     | 0.131             | 0.40                                                      | 0.526             | 3.70                     | .055              |
| Race                                                                                       | 0.03              | 0.853             | 1.64                     | 0.201             | 0.03                                                      | 0.869             | 1.26                     | 0.262             |
| Study site                                                                                 | 37.45             | <b>&lt;0.0001</b> | 1.31                     | 0.253             | 36.77                                                     | <b>&lt;0.0001</b> | 1.05                     | 0.306             |
| Baseline weight (kg)                                                                       | 6.35              | <b>0.012</b>      | 14.31                    | <b>0.0002</b>     | 2.91                                                      | 0.088             | 5.35                     | <b>0.021</b>      |
| $\Delta$ Weight change, year 3 – baseline                                                  | 0.44              | 0.506             | 3.19                     | 0.074             | 0.27                                                      | 0.602             | 5.17                     | <b>0.023</b>      |
| Baseline smoking rate (cigarettes per day)                                                 | 0.24              | 0.627             | 1.24                     | 0.265             | 0.15                                                      | 0.702             | 7.06                     | <b>0.008</b>      |
| Baseline IFG group (glucose < 100 mg/dL vs. glucose $\geq$ 100 mg/dL and $\leq$ 125 mg/dL) | 40.85             | <b>&lt;0.0001</b> | 15.95                    | <b>&lt;0.0001</b> | 41.96                                                     | <b>&lt;0.0001</b> | 16.30                    | <b>&lt;0.0001</b> |
| Baseline hemoglobin A <sub>1</sub> C group (< 5.7% vs. $\geq$ 5.7%)                        | 1.70              | 0.193             | 16.04                    | <b>&lt;0.0001</b> | 1.44                                                      | 0.230             | 19.52                    | <b>&lt;0.0001</b> |

| New Table 3A                                       | ORIGINAL ANALYSIS |         |                          |              | NEW ANALYSIS<br>(Uses new Year 3 Smoking Status Variable) |              |                          |                  |
|----------------------------------------------------|-------------------|---------|--------------------------|--------------|-----------------------------------------------------------|--------------|--------------------------|------------------|
|                                                    | Year 3 IFG        |         | Year 3 diabetes mellitus |              | Year 3 IFG                                                |              | Year 3 diabetes mellitus |                  |
| Main Effects or Interactions                       | Wald $\chi^2$     | p-value | Wald $\chi^2$            | p-value      | Wald $\chi^2$                                             | p-value      | Wald $\chi^2$            | p-value          |
| <b>Interactions:</b>                               |                   |         |                          |              |                                                           |              |                          |                  |
| Baseline weight *<br>year 3 smoking status         | 1.41              | 0.235   | 6.10                     | <b>0.014</b> | 5.32                                                      | <b>0.021</b> | 8.25                     | <b>0.004</b>     |
| Weight change * baseline<br>cigarettes per day     | 1.46              | 0.228   | 0.09                     | 0.755        | 1.88                                                      | 0.170        | 0.93                     | 0.335            |
| Baseline cigarettes/day *<br>year 3 smoking status | 1.53              | 0.217   | 9.07                     | <b>0.003</b> | 2.68                                                      | 0.101        | 18.56                    | <b>&lt;0.001</b> |

*Reference group = normal Year 3 glycemic status; IFG = impaired fasting glucose*

*NOTE: In the new analysis, “Year 3 smoking status” was coded so that “abstinent” required CO-confirmed abstinence at both 6 months and at Year 3; if smoking at either 6-months or 3 years (or both), then the variable was coded as smoking.*

**New Table 3B. Best-Fitting Multivariate Multinomial Logistic Regression Model Predicting Year 3 Glucose Group (Normal, Impaired Fasting Glucose, Diabetes Mellitus)**

**THIS NEW ANALYSIS:** Uses the New Version of Year 3 Smoking Status [if smoking at either 6-months or 3 years (or both), then the variable was coded as smoking] PLUS it adds treatment (with Dummy-Coded Variables). Differences in the significance of effects (original vs new results) are highlighted in BLUE.

| New Table 3B                                                                               | ORIGINAL ANALYSIS |                   |                          |                   | NEW ANALYSIS<br>(Adds Treatment Variables and Uses New Year 3 Smoking Status Variable) |                   |                          |                   |
|--------------------------------------------------------------------------------------------|-------------------|-------------------|--------------------------|-------------------|----------------------------------------------------------------------------------------|-------------------|--------------------------|-------------------|
|                                                                                            | Year 3 IFG        |                   | Year 3 diabetes mellitus |                   | Year 3 IFG                                                                             |                   | Year 3 diabetes mellitus |                   |
| Main Effects or Interactions                                                               | Wald $\chi^2$     | p-value           | Wald $\chi^2$            | p-value           | Wald $\chi^2$                                                                          | p-value           | Wald $\chi^2$            | p-value           |
| Year 3 smoking status (abstinent vs. smoking)                                              | 0.75              | 0.387             | 0.73                     | 0.392             | 2.68                                                                                   | 0.102             | 0.028                    | 0.868             |
| Age (years)                                                                                | 9.46              | <b>0.011</b>      | 14.53                    | <b>0.0001</b>     | 6.83                                                                                   | <b>0.009</b>      | 13.83                    | <b>0.0002</b>     |
| Gender                                                                                     | 0.85              | 0.357             | 2.29                     | 0.131             | 0.52                                                                                   | 0.471             | 4.22                     | <b>0.040</b>      |
| Race                                                                                       | 0.03              | 0.853             | 1.64                     | 0.201             | 0.018                                                                                  | 0.893             | 1.42                     | 0.233             |
| Study site                                                                                 | 37.45             | <b>&lt;0.0001</b> | 1.31                     | 0.253             | 38.67                                                                                  | <b>&lt;0.0001</b> | 1.12                     | 0.290             |
| Baseline weight (kg)                                                                       | 6.35              | <b>0.012</b>      | 14.31                    | <b>0.0002</b>     | 3.24                                                                                   | <b>0.072</b>      | 4.74                     | <b>0.0294</b>     |
| $\Delta$ Weight change, year 3 – baseline                                                  | 0.44              | 0.506             | 3.19                     | 0.074             | 0.29                                                                                   | 0.590             | 5.43                     | <b>0.0198</b>     |
| Baseline smoking rate (cigarettes per day)                                                 | 0.24              | 0.627             | 1.24                     | 0.265             | 0.16                                                                                   | 0.692             | 6.82                     | <b>0.009</b>      |
| Baseline IFG group (glucose < 100 mg/dL vs. glucose $\geq$ 100 mg/dL and $\leq$ 125 mg/dL) | 40.85             | <b>&lt;0.0001</b> | 15.95                    | <b>&lt;0.0001</b> | 41.94                                                                                  | <b>&lt;0.0001</b> | 16.20                    | <b>&lt;0.0001</b> |

| New Table 3B                                                           | ORIGINAL ANALYSIS |         |                             |                   | NEW ANALYSIS<br>(Adds Treatment Variables and Uses New<br>Year 3 Smoking Status Variable) |              |                             |                   |
|------------------------------------------------------------------------|-------------------|---------|-----------------------------|-------------------|-------------------------------------------------------------------------------------------|--------------|-----------------------------|-------------------|
|                                                                        | Year 3 IFG        |         | Year 3 diabetes<br>mellitus |                   | Year 3 IFG                                                                                |              | Year 3 diabetes<br>mellitus |                   |
| Main Effects or Interactions                                           | Wald $\chi^2$     | p-value | Wald $\chi^2$               | p-value           | Wald $\chi^2$                                                                             | p-value      | Wald $\chi^2$               | p-value           |
| Baseline hemoglobin A <sub>1</sub> C<br>group (< 5.7% vs. $\geq$ 5.7%) | 1.70              | 0.193   | 16.04                       | <b>&lt;0.0001</b> | 1.59                                                                                      | 0.208        | 20.90                       | <b>&lt;0.0001</b> |
| Bupropion                                                              | -                 | -       | -                           | -                 | 0.11                                                                                      | .740         | 0.389                       | 0.533             |
| Lozenge                                                                | -                 | -       | -                           | -                 | 0.02                                                                                      | .895         | 1.06                        | 0.304             |
| Patch                                                                  | -                 | -       | -                           | -                 | 0.95                                                                                      | 0.330        | 0.0003                      | 0.987             |
| Bupropion + Lozenge                                                    | -                 | -       | -                           | -                 | 0.19                                                                                      | 0.665        | 1.73                        | 0.189             |
| Patch + Lozenge                                                        | -                 | -       | -                           | -                 | 1.02                                                                                      | 0.312        | 2.10                        | 0.148             |
| <b>Interactions:</b>                                                   |                   |         |                             |                   |                                                                                           |              |                             |                   |
| Baseline weight *<br>year 3 smoking status                             | 1.41              | 0.235   | 6.10                        | <b>0.014</b>      | 5.12                                                                                      | <b>0.024</b> | 8.90                        | <b>0.0029</b>     |
| Weight change * baseline<br>cigarettes per day                         | 1.46              | 0.228   | 0.09                        | 0.755             | 1.87                                                                                      | 0.171        | 1.28                        | 0.258             |
| Baseline cigarettes/day *<br>year 3 smoking status                     | 1.53              | 0.217   | 9.07                        | <b>0.003</b>      | 2.45                                                                                      | 0.117        | 17.48                       | <b>&lt;0.0001</b> |
| Bupropion *<br>year 3 smoking status                                   | -                 | -       | -                           | -                 | 0.59                                                                                      | 0.443        | 0.16                        | 0.691             |
| Lozenge *<br>year 3 smoking status                                     | -                 | -       | -                           | -                 | 1.10                                                                                      | 0.294        | 0.05                        | 0.825             |
| Patch *<br>year 3 smoking status                                       | -                 | -       | -                           | -                 | 0.15                                                                                      | 0.701        | 1.87                        | 0.171             |

| New Table 3B                                   | ORIGINAL ANALYSIS |         |                             |         | NEW ANALYSIS<br>(Adds Treatment Variables and Uses New<br>Year 3 Smoking Status Variable) |         |                             |         |
|------------------------------------------------|-------------------|---------|-----------------------------|---------|-------------------------------------------------------------------------------------------|---------|-----------------------------|---------|
|                                                | Year 3 IFG        |         | Year 3 diabetes<br>mellitus |         | Year 3 IFG                                                                                |         | Year 3 diabetes<br>mellitus |         |
| Main Effects or Interactions                   | Wald $\chi^2$     | p-value | Wald $\chi^2$               | p-value | Wald $\chi^2$                                                                             | p-value | Wald $\chi^2$               | p-value |
| Bupropion + Lozenge *<br>year 3 smoking status | -                 | -       | -                           | -       | 0.12                                                                                      | 0.724   | 0.74                        | 0.389   |
| Patch + Lozenge *<br>year 3 smoking status     | -                 | -       | -                           | -       | 0.41                                                                                      | 0.522   | 0.68                        | 0.411   |

*Reference group = normal Year 3 glycemic status; IFG = impaired fasting glucose*

*NOTE: In the new analysis, “Year 3 smoking status” was coded so that “abstinent” required CO-confirmed abstinence at both 6 months and at Year 3; if smoking at either 6-months or 3 years (or both), then the variable was coded as smoking.*
